# Supplementary material for: Construction of 2D covalent organic frameworks by taking advantage of the variable orientation of imine bonds
Source: Royal Society of Chemistry journal article supplement (doi:10.1039/c6cc09906h), 2017-01-01
Supplement: c6cc09906h1.pdf [file c6cc09906h1.pdf]

## Electronic Supplementary Information

### Construction of 2D covalent organic frameworks by taking advantage of the variable orientation of imine bond

Shun-Qi Xu,<sup>‡</sup> Rong-Ran Liang,<sup>‡</sup> Tian-Guang Zhan, Qiao-Yan Qi, and Xin Zhao\*

(<sup>‡</sup>These authors contributed equally)

Key Laboratory of Synthetic and Self-Assembly Chemistry for Organic Functional  
Molecules, Shanghai Institute of Organic Chemistry, Chinese Academy of Sciences,

345 Lingling Road, Shanghai 200032, China

Email: xzhao@sioc.ac.cn

## **Instruments and methods**

### **Thermal gravimetric analysis (TGA)**

Thermal gravimetric analysis was carried out on a Waters TGA Q500 by heating the samples from 30 to 950 °C under nitrogen atmosphere at a heating rate of 10 °C/min.

### **Fourier transform infrared spectroscopy (FTIR)**

Fourier transform infrared spectroscopy (FTIR) was carried out with a Nicolet 380 FTIR spectrometer. The samples for IR study were prepared as KBr pellets.

### **Solid-state nuclear magnetic resonance (NMR) spectroscopy**

The <sup>13</sup>C CP/MAS NMR spectra of the COFs were recorded on an Agilent DD2 600 Solid NMR System with 4 mm zirconia rotors. The spinning rate is 9 kHz and the contact time is 3 ms.

### **Scanning electron microscopy (SEM)**

Scanning electron microscopy was carried out using a JEOL JSM-6390LV scanning electron microscope. The sample was dispersed over a slice of silicon wafer adhered to a flat copper platform sample holder and then coated with gold using a sputter coater (ambient temperature, 85 torr pressure in an nitrogen atmosphere, sputtered for 30 s from a solid gold target at a current at 30 mA) before being submitted to SEM characterization.

### **Powder X-ray diffraction**

Powder X-ray diffraction measurements were carried out with a X'Pert PRO Powder system using monochromated Cu/K $\alpha$ ( $\lambda$ = 0.1542 nm). The sample was spread on the square recess of XRD sample holder as a thin layer.

### **Structural simulation and powder X-ray diffraction analysis**

The simulations of the possible structures were carried out by using Accelrys Materials Studio 7.0 software package. Before the simulations, the structures were firstly optimized in Gaussian 09 package by semiempirical calculations at PM3 level. The stimulated PXRD patterns were determined by the Reflex module. P1 space group was used for the simulation. The Pawley refinement of the experimental PXRD was conducted by the Reflux module in the Material Studio 7.0.

### **Nitrogen adsorption-desorption isotherm measurement**

The measurements were carried out using a Quadrasorb SI MP. Before gas adsorption measurements, the as-prepared sample (about 50 mg) was activated by being immersed in anhydrous 1,4-dioxane for 12 h for 3 times. The solvent was decanted and the sample was dried under dynamic vacuum at 120 °C for 4 h. The resulting sample was then used for gas adsorption measurements from 0 to 1 atm at 77 K. The Brunauer-Emmett-Teller (BET) method was utilized to calculate the specific surface areas. By using the non-local density functional theory model, the pore size distribution curves were derived from the sorption data.

### Synthesis of HAT-NTBA-COF

HAT-6NH<sub>2</sub><sup>1</sup> (25 mg, 0.032 mmol) and NTBA<sup>2</sup> (21 mg, 0.064 mmol) were dissolved in a mixture of N,N-dimethylacetamide (0.75 mL) and 1,3,5-trimethylbenzene (0.75 mL) in a glass tube. The mixture was sonicated for a while and then acetic acid (6 M (aq.), 0.15 mL) was added. The system was degassed through three freeze–pump–thaw cycles and then the tube was sealed under vacuum. The mixture was heated at 120 °C for 3 days to afford a yellow solid at the bottom of the tube. After being cooled to room temperature, the solvent was decanted and the solid was washed with anhydrous 1,4-dioxane and acetone for 3 times respectively and then dried under dynamic vacuum at 120 °C for 2 h to afford a yellow powder (30.7 mg, 72%), which was insoluble in common organic solvents such as acetone, ethanol, and N,N-dimethylformamide. Anal. Calcd. For C<sub>90</sub>H<sub>54</sub>N<sub>14</sub>: C, 81.18; H, 4.09; N, 14.73. Found: C, 73.03; H, 4.42; N, 13.54.

### Synthesis of HAT-NTBCA-COF

HAT-6NH<sub>2</sub><sup>1</sup> (21 mg, 0.027 mmol) and NTBCA<sup>3</sup> (30 mg, 0.054 mmol) were dissolved in a mixture of N,N-dimethylacetamide (0.75 mL) and 1,3,5-trimethylbenzene (0.75 mL) in a glass tube. The mixture was sonicated for a while and then acetic acid (6 M (aq.), 0.15 mL) was added. The system was degassed through three freeze–pump–thaw cycles and then the tube was sealed under vacuum. The mixture was heated at 120 °C for 3 days to afford a yellow solid at the bottom of the tube. After being cooled to room temperature, the solvent was decanted and the solid was washed with anhydrous 1,4-dioxane and acetone for 3 times respectively and then dried under

dynamic vacuum at 120 °C for 2 h to afford a yellow powder (31.4 mg, 65%), which was insoluble in common organic solvents such as acetone, ethanol, and N,N-dimethylformamide. Anal. Calcd. For C<sub>126</sub>H<sub>78</sub>N<sub>14</sub>: C, 84.64; H, 4.40; N, 10.97. Found: C, 74.74; H, 4.83; N, 9.53.

**References for the synthesis of the monomers:**

- 1 T.-G. Zhan, T.-Y. Zhou, Q.-Y. Qi, J. Wu, G.-Y. Li and X. Zhao, *Polym. Chem.*, 2015, **6**, 7586-7593.
- 2 Y. Sun, Y. Sun, Q. Pan, G. Li, B. Han, D. Zeng, Y. Zhang and H. Cheng, *Chem. Commun.*, 2016, **52**, 3000-3002.
- 3 B. Jędrzejewska, M. Gordel, J. Szeremeta, P. Krawczyk and M. Samoc, *J. Org. Chem.*, 2015, **80**, 9641-9651.

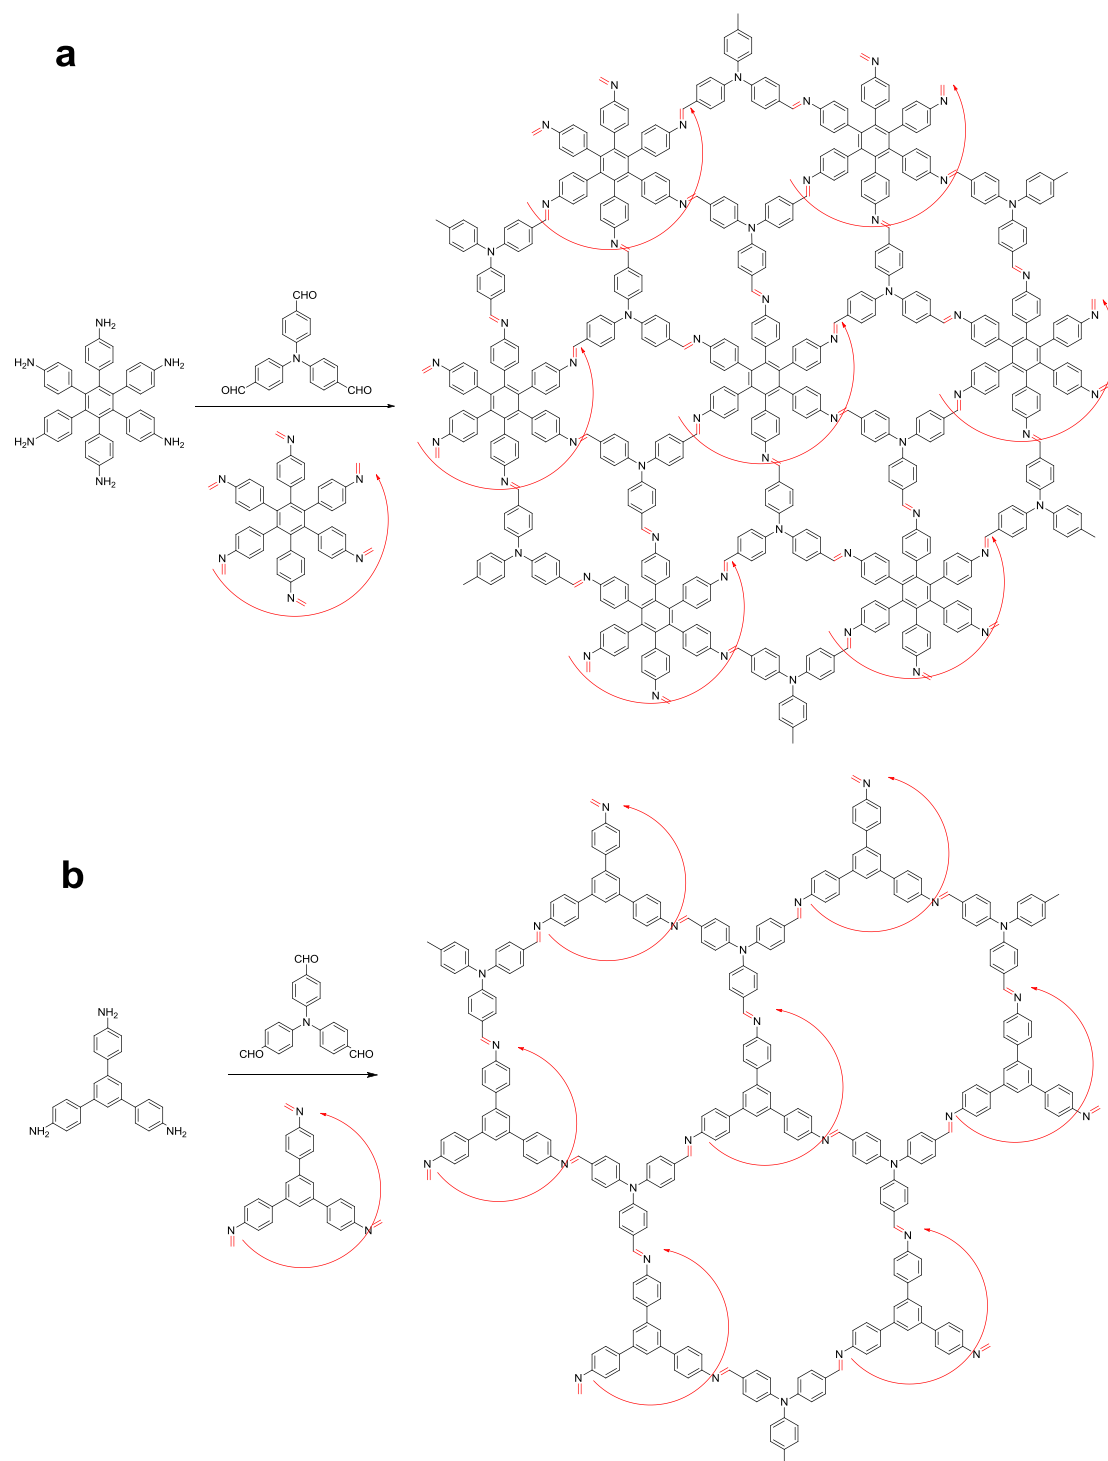

**Scheme S1.** Illustration for the construction of COFs from the combination of (a)  $C_6$ -symmetric and  $C_3$ -symmetric monomers, and (b) two common  $C_3$ -symmetric monomers, in which the adoption of a homodromous orientation of C=N linkages can be observed.

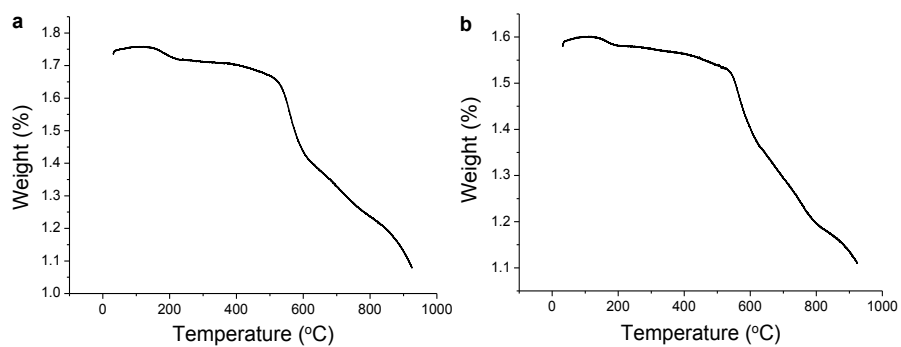

**Figure S1.** TGA profiles of (a) **HAT-NTBA-COF** and (b) **HAT-NTBCA-COF**.

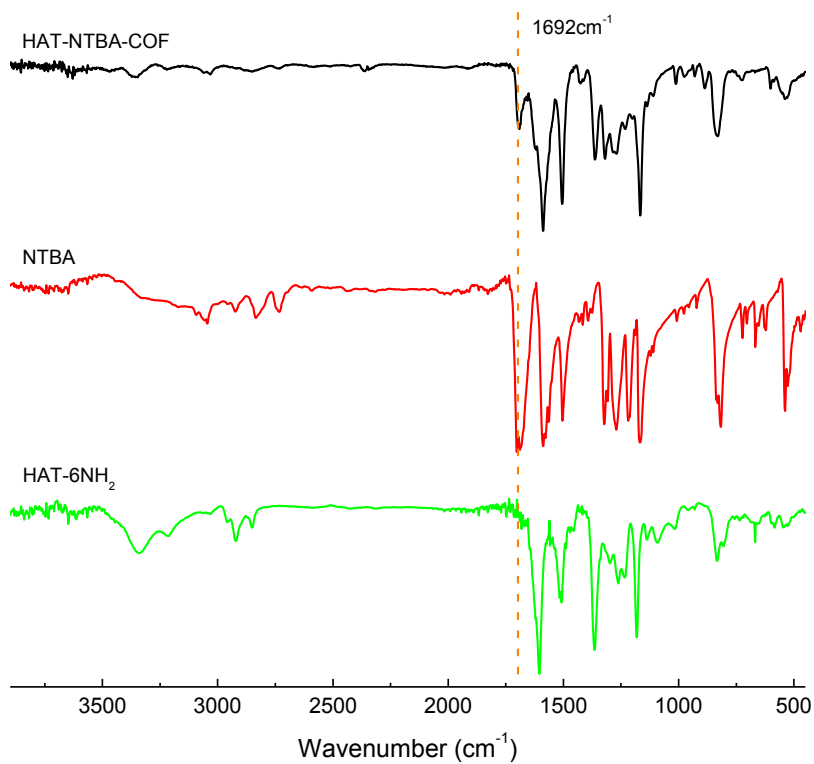

**Figure S2.** FTIR spectra of **HAT-6NH<sub>2</sub>** (green), **NTBA** (red) and **HAT-NTBA-COF** (black).

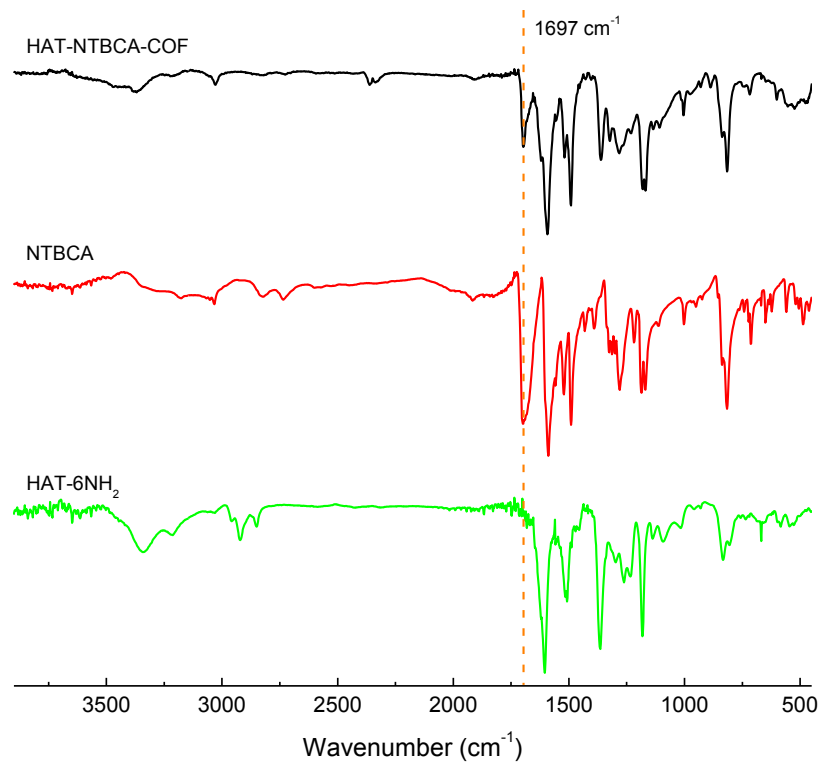

**Figure S3.** FTIR spectra of **HAT-6NH<sub>2</sub>** (green), **NTBCA** (red) and **HAT-NTBCA-COF** (black).

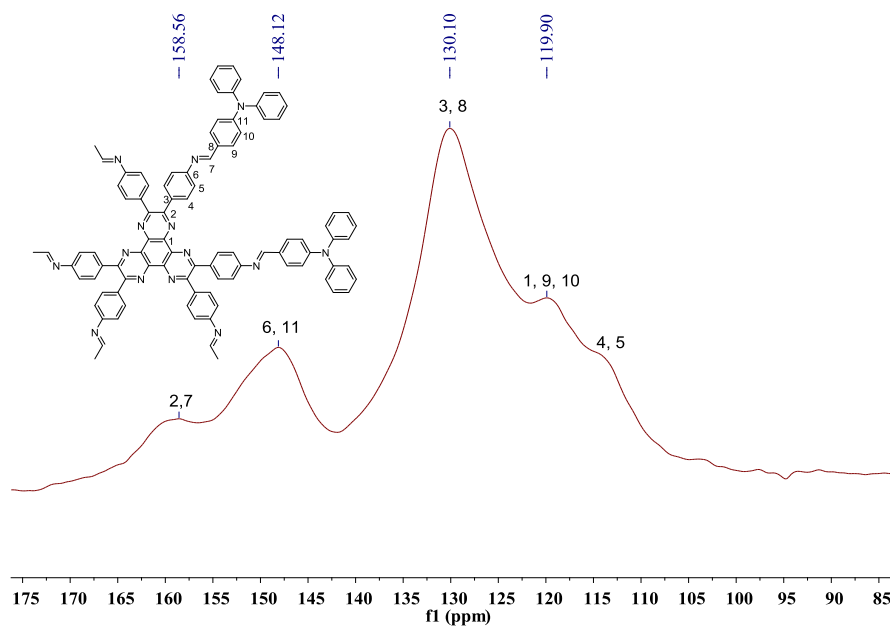

**Figure S4.** Solid-state <sup>13</sup>C CP/MAS NMR Spectrum of **HAT-NTBA-COF**.



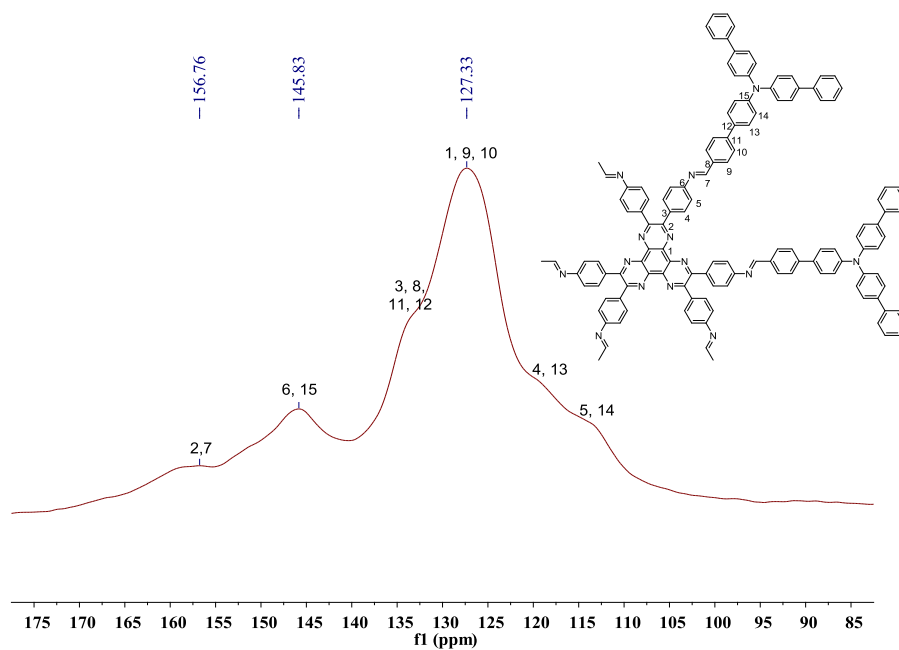

**Figure S5.** Solid-state  $^{13}\text{C}$  CP/MAS NMR Spectrum of **HAT-NTBCA-COF**.

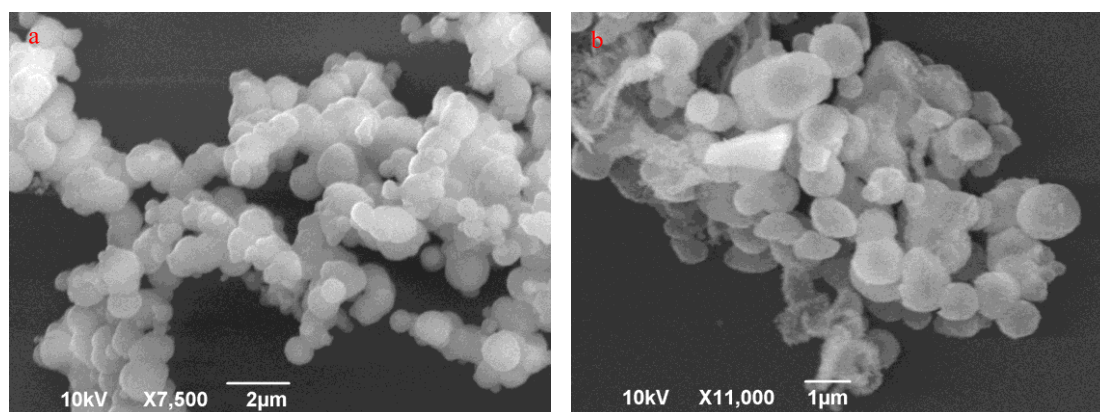

**Figure S6.** SEM images of (a) **HAT-NTBA-COF** and (b) **HAT-NTBCA-COF**.

**Table S1.** Calculated total energies of eclipsed structure of **HAT-NTBA-COF** at different layer distances.

| Layer distance (Å) | Total energy (kcal/mol) |
|--------------------|-------------------------|
| 3.00               | 797.737                 |
| 3.10               | 695.822                 |
| 3.20               | 760.132                 |
| 3.30               | 641.239                 |
| 3.40               | 675.259                 |
| 3.50               | 640.398                 |
| 3.60               | 580.212                 |
| 3.70               | 568.645                 |
| 3.80               | 539.224                 |
| 3.90               | 514.947                 |
| 4.00               | 523.504                 |
| <b>4.10</b>        | <b>507.257</b>          |
| 4.20               | 534.597                 |
| 4.30               | 519.460                 |
| 4.40               | 535.572                 |
| 4.50               | 526.099                 |
| 4.60               | 540.876                 |
| 4.70               | 531.523                 |
| 4.80               | 584.733                 |
| 4.90               | 665.826                 |
| 5.00               | 544.146                 |

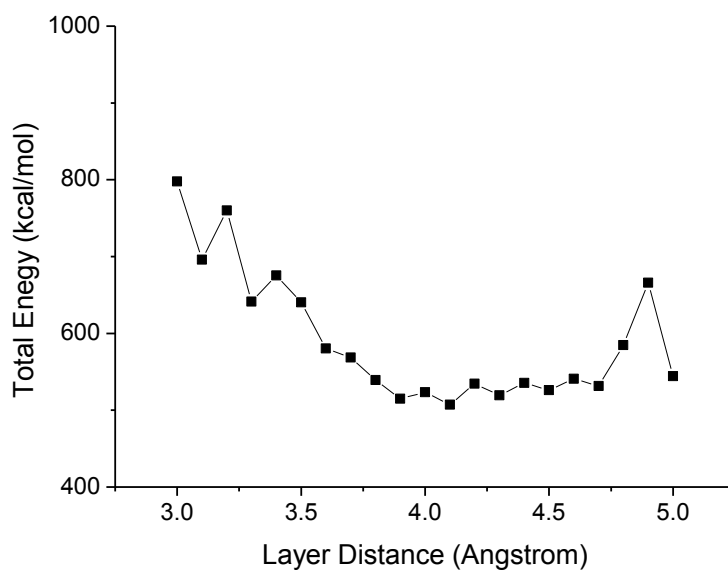

**Figure S7.** Plot of total energy of eclipsed structure of **HAT-NTBA-COF** vs. layer distance.

**Table S2.** Calculated total energies of eclipsed structure of **HAT-NTBCA-COF** at different layer distances.

| Layer distance (Å) | Total energy (kcal/mol) |
|--------------------|-------------------------|
| 3.00               | 1356.937                |
| 3.10               | 1291.528                |
| 3.20               | 1251.632                |
| 3.30               | 1215.800                |
| 3.40               | 1190.406                |
| 3.50               | 1178.249                |
| 3.60               | 1155.517                |
| 3.70               | 1149.438                |
| 3.80               | 1151.582                |
| 3.90               | 1146.941                |
| 4.00               | 1135.214                |

|             |                 |
|-------------|-----------------|
| 4.10        | 1136.737        |
| <b>4.20</b> | <b>1133.160</b> |
| 4.30        | 1141.351        |
| 4.40        | 1145.569        |
| 4.50        | 1145.083        |
| 4.60        | 1144.101        |
| 4.70        | 1146.100        |
| 4.80        | 1146.740        |
| 4.90        | 1157.809        |
| 5.00        | 1156.300        |

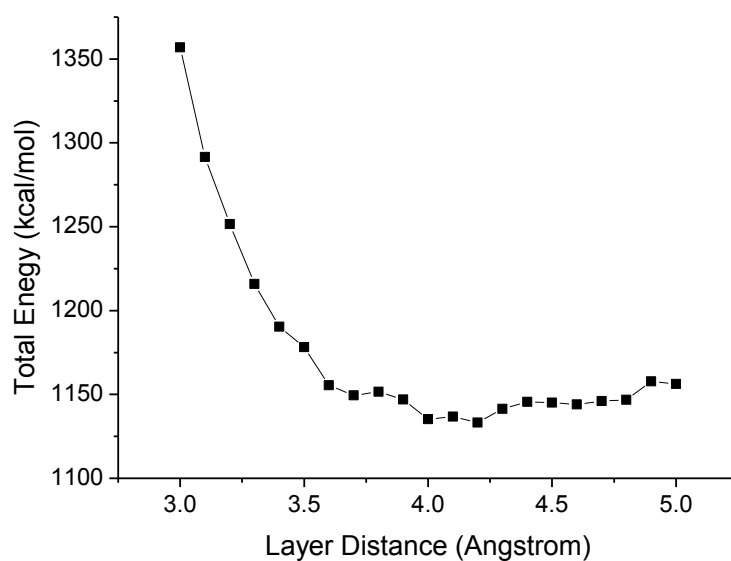

**Figure S8.** Plot of total energy of eclipsed structure of **HAT-NTBCA-COF** vs. layer distance.

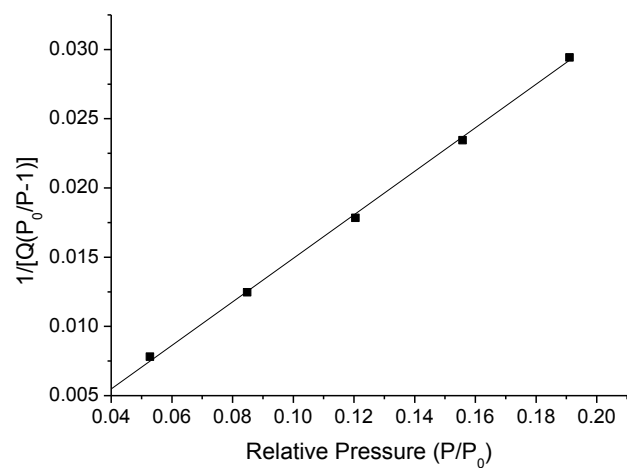

**Figure S9.** BET surface area plot for **HAT-NTBA-COF** calculated from the isotherm.

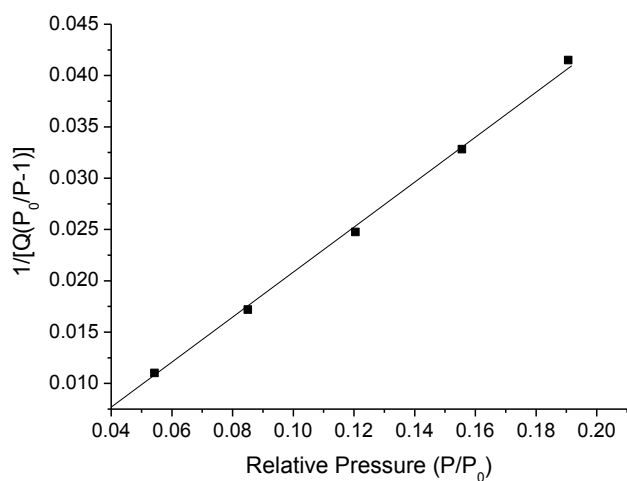

**Figure S10.** BET surface area plot for **HAT-NTBA-COF** calculated from the isotherm.

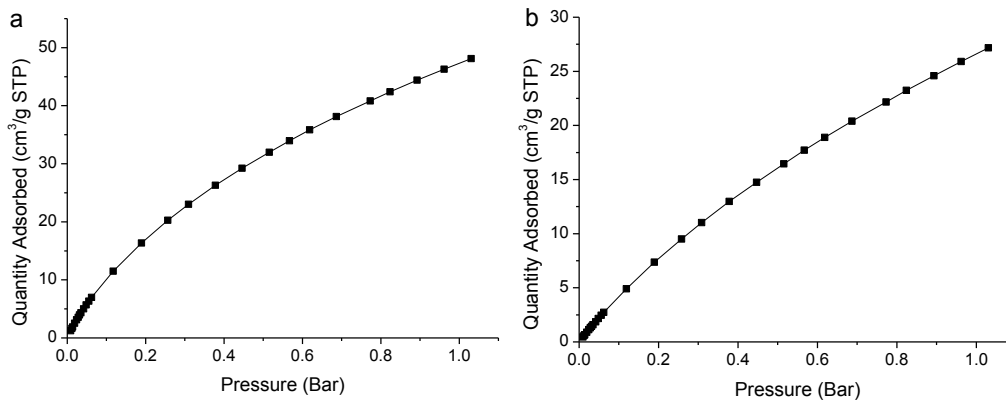

**Figure S11.** CO<sub>2</sub> adsorption isotherms of HAT-NTBA-COF at (a) 273 K and (b) 298

K.

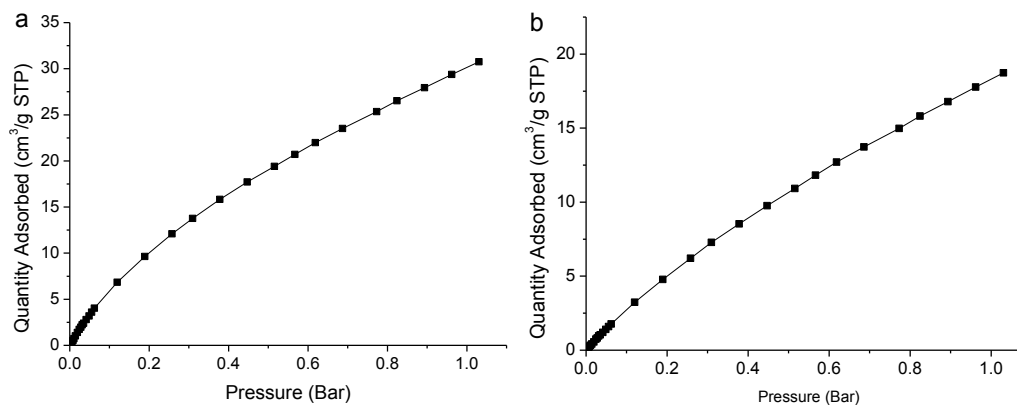

**Figure S12.** CO<sub>2</sub> adsorption isotherms of HAT-NTBCA-COF at (a) 273 K and (b)

298 K.

**Table S3.** Fractional atomic coordinates for the unit cell of **HAT-NTBA-COF** with AA stacking.

| P1                                                                                  |          |          |          |      |          |          |          |
|-------------------------------------------------------------------------------------|----------|----------|----------|------|----------|----------|----------|
| a = b = 25.83 Å, c = 4.10 Å, $\alpha = \beta = 90^\circ$ , and $\gamma = 120^\circ$ |          |          |          |      |          |          |          |
| H1                                                                                  | 1.104463 | 0.872028 | 0.707929 | C80  | 1.022049 | 0.732949 | 0.280638 |
| H2                                                                                  | 1.21074  | 0.930704 | 0.792572 | C81  | 1.0582   | 0.793289 | 0.185044 |
| H3                                                                                  | 1.206308 | 1.095346 | 0.713967 | C82  | 1.043415 | 0.836471 | 0.259978 |
| H4                                                                                  | 1.100246 | 1.040648 | 0.61932  | C83  | 0.683899 | 0.67386  | 1.324726 |
| H5                                                                                  | 0.912359 | 0.744027 | 0.67452  | C84  | 0.660926 | 0.613599 | 1.373958 |
| H6                                                                                  | 0.938618 | 0.669955 | 0.517282 | C85  | 0.688465 | 0.582683 | 1.252673 |
| H7                                                                                  | 1.100382 | 0.80728  | 0.056394 | C86  | 0.74231  | 0.615872 | 1.079396 |
| H8                                                                                  | 1.073412 | 0.883934 | 0.194658 | C87  | 0.766533 | 0.676122 | 1.025442 |
| H9                                                                                  | 0.656946 | 0.692817 | 1.423382 | C88  | 0.66035  | 0.831609 | 1.197323 |
| H10                                                                                 | 0.618766 | 0.588475 | 1.509927 | C89  | 0.603839 | 0.820186 | 1.117104 |
| H11                                                                                 | 0.766162 | 0.594376 | 0.977198 | C90  | 0.563168 | 0.766475 | 0.961431 |
| H12                                                                                 | 0.808758 | 0.69969  | 0.887653 | C91  | 0.581234 | 0.725027 | 0.889846 |
| H13                                                                                 | 0.691918 | 0.875297 | 1.307239 | C92  | 0.636731 | 0.73468  | 0.971781 |
| H14                                                                                 | 0.59096  | 0.853722 | 1.177706 | C93  | 0.874601 | 1.135653 | 1.26358  |
| H15                                                                                 | 0.549408 | 0.682366 | 0.772964 | C94  | 0.835623 | 1.155276 | 1.349633 |
| H16                                                                                 | 0.643904 | 0.698377 | 0.892674 | C95  | 0.779593 | 1.117932 | 1.491446 |
| H17                                                                                 | 0.915927 | 1.170843 | 1.144693 | C96  | 0.763796 | 1.05875  | 1.557523 |
| H18                                                                                 | 0.848128 | 1.201821 | 1.292526 | C97  | 0.801457 | 1.037602 | 1.481979 |
| H19                                                                                 | 0.720705 | 1.02789  | 1.671435 | C98  | 1.051459 | 1.152441 | 1.04505  |
| H20                                                                                 | 0.785963 | 0.990529 | 1.543309 | C99  | 1.08448  | 1.213766 | 1.011886 |
| H21                                                                                 | 1.061829 | 1.124377 | 0.886451 | C100 | 1.068299 | 1.25151  | 1.175661 |
| H22                                                                                 | 1.122373 | 1.232263 | 0.841042 | C101 | 1.021035 | 1.225236 | 1.402276 |
| H23                                                                                 | 1.009288 | 1.25383  | 1.545814 | C102 | 0.98894  | 1.164024 | 1.446328 |
| H24                                                                                 | 0.951029 | 1.141628 | 1.617072 | C103 | 0.683599 | 1.110114 | 1.580617 |
| H25                                                                                 | 0.657519 | 1.060746 | 1.581231 | C104 | 1.138895 | 1.345559 | 0.91184  |
| H26                                                                                 | 1.161987 | 1.327534 | 0.766839 | C105 | 1.300114 | 1.098564 | 1.021493 |

|     |          |          |          |      |          |          |          |
|-----|----------|----------|----------|------|----------|----------|----------|
| H27 | 1.273611 | 1.118286 | 1.108543 | C106 | 1.08985  | 0.69966  | 0.12682  |
| H28 | 1.118699 | 0.73894  | -0.02328 | C107 | 0.682562 | 0.486766 | 1.223101 |
| H29 | 0.727037 | 0.505116 | 1.109973 | C108 | 0.466489 | 0.757851 | 1.042467 |
| H30 | 0.478237 | 0.786413 | 1.258689 | C109 | 1.156314 | 1.407731 | 0.855467 |
| H31 | 1.391445 | 1.076716 | 0.835772 | C110 | 1.363012 | 1.130665 | 1.104628 |
| H32 | 1.495584 | 1.134444 | 0.986301 | C111 | 1.405    | 1.115241 | 0.998023 |
| H33 | 1.457155 | 1.252122 | 1.559784 | C112 | 1.464904 | 1.148214 | 1.085786 |
| H34 | 1.355055 | 1.196472 | 1.396581 | C113 | 1.487065 | 1.198421 | 1.29208  |
| H35 | 1.224399 | 1.421395 | 0.49982  | C114 | 1.445017 | 1.214528 | 1.39388  |
| H36 | 1.257492 | 1.525983 | 0.393145 | C115 | 1.385224 | 1.181442 | 1.303246 |
| H37 | 1.130536 | 1.51971  | 1.100858 | C116 | 1.202374 | 1.441796 | 0.634732 |
| H38 | 1.09408  | 1.414496 | 1.187638 | C117 | 1.221852 | 1.501735 | 0.574054 |
| H39 | 1.643452 | 1.296245 | 0.990111 | C118 | 1.197336 | 1.532214 | 0.738895 |
| H40 | 1.700908 | 1.404257 | 0.931738 | C119 | 1.150287 | 1.498153 | 0.955847 |
| H41 | 1.58551  | 1.421133 | 1.638602 | C120 | 1.130233 | 1.437757 | 1.008863 |
| H42 | 1.533487 | 1.314331 | 1.724711 | C121 | 1.184636 | 1.616867 | 0.544155 |
| H43 | 1.506453 | 1.110215 | 1.475816 | C122 | 1.283062 | 1.636573 | 0.77845  |
| H44 | 1.563308 | 1.061387 | 1.548782 | C123 | 1.581465 | 1.295415 | 1.349805 |
| H45 | 1.726392 | 1.232387 | 1.567199 | C124 | 1.58276  | 1.201341 | 1.451777 |
| H46 | 1.670764 | 1.282213 | 1.499295 | C125 | 1.630414 | 1.32371  | 1.135367 |
| H47 | 1.307359 | 1.568139 | 0.886537 | C126 | 1.663013 | 1.385432 | 1.102786 |
| H48 | 1.408465 | 1.635677 | 1.030937 | C127 | 1.647306 | 1.422542 | 1.273639 |
| H49 | 1.381823 | 1.786513 | 0.887818 | C128 | 1.598903 | 1.394539 | 1.488406 |
| H50 | 1.279775 | 1.720025 | 0.744827 | C129 | 1.567189 | 1.332747 | 1.529906 |
| H51 | 1.258355 | 1.686707 | 0.276742 | C130 | 1.555269 | 1.138909 | 1.485904 |
| H52 | 1.203459 | 1.729738 | 0.034792 | C131 | 1.588264 | 1.110424 | 1.534132 |
| H53 | 1.043322 | 1.596033 | 0.518375 | C132 | 1.650736 | 1.141884 | 1.552618 |
| H54 | 1.097781 | 1.552398 | 0.752189 | C133 | 1.677709 | 1.204262 | 1.545117 |
| C55 | 0.855993 | 0.853453 | 0.98527  | C134 | 1.645132 | 1.233083 | 1.498231 |
| C56 | 0.913276 | 0.877825 | 0.873114 | C135 | 1.322035 | 1.616053 | 0.874067 |



|     |          |          |          |      |          |          |          |
|-----|----------|----------|----------|------|----------|----------|----------|
| C57 | 0.951721 | 0.937525 | 0.888376 | C136 | 1.380688 | 1.655256 | 0.96382  |
| C58 | 0.931999 | 0.973896 | 1.013625 | C137 | 1.404474 | 1.71724  | 0.968895 |
| C59 | 0.874151 | 0.949939 | 1.112874 | C138 | 1.36579  | 1.738147 | 0.886702 |
| C60 | 0.835362 | 0.889285 | 1.095549 | C139 | 1.307362 | 1.699303 | 0.79071  |
| C61 | 0.950464 | 1.066983 | 1.178408 | C140 | 1.210688 | 1.666106 | 0.332401 |
| C62 | 0.891281 | 1.045095 | 1.236978 | C141 | 1.178974 | 1.690919 | 0.195519 |
| C63 | 0.741223 | 0.806588 | 1.136908 | C142 | 1.118492 | 1.668221 | 0.261323 |
| C64 | 0.76475  | 0.770511 | 1.088065 | C143 | 1.091086 | 1.617023 | 0.458831 |
| C65 | 0.985652 | 0.864751 | 0.625764 | C144 | 1.122706 | 1.591396 | 0.593305 |
| C66 | 1.026991 | 0.922708 | 0.684263 | N145 | 0.970813 | 1.031844 | 1.040776 |
| C67 | 0.859059 | 1.074174 | 1.327367 | N146 | 0.852884 | 0.983868 | 1.220342 |
| C68 | 0.997334 | 1.125777 | 1.232751 | N147 | 0.778258 | 0.867753 | 1.170183 |
| C69 | 0.680024 | 0.789682 | 1.120971 | N148 | 0.822808 | 0.794477 | 0.984225 |
| C70 | 0.737732 | 0.708057 | 1.139093 | N149 | 0.928475 | 0.840734 | 0.741691 |
| C71 | 1.090376 | 0.951035 | 0.654568 | N150 | 1.008482 | 0.961191 | 0.79899  |
| C72 | 0.993133 | 0.821046 | 0.46369  | N151 | 0.741293 | 1.140611 | 1.553494 |
| C73 | 1.125161 | 0.921212 | 0.687712 | N152 | 1.096176 | 1.313523 | 1.11557  |
| C74 | 1.185818 | 0.954374 | 0.748843 | N153 | 1.277375 | 1.049069 | 0.85679  |
| C75 | 1.216523 | 1.017056 | 0.769818 | N154 | 1.039295 | 0.689502 | 0.244752 |
| C76 | 1.18403  | 1.046326 | 0.708914 | N155 | 0.660977 | 0.520532 | 1.306508 |
| C77 | 1.123856 | 1.01519  | 0.647235 | N156 | 0.504495 | 0.749964 | 0.878585 |
| C78 | 0.952786 | 0.758532 | 0.525276 | N157 | 1.221284 | 1.595329 | 0.68977  |
| C79 | 0.968133 | 0.716614 | 0.440643 | N158 | 1.549495 | 1.231434 | 1.381753 |

**Table S4.** Fractional atomic coordinates for the unit cell of **HAT-NTBCA-COF** with

AA stacking.

| P1                                                                                  |          |          |         |      |          |          |          |
|-------------------------------------------------------------------------------------|----------|----------|---------|------|----------|----------|----------|
| a = b = 33.03 Å, c = 4.20 Å, $\alpha = \beta = 90^\circ$ , and $\gamma = 120^\circ$ |          |          |         |      |          |          |          |
| H1                                                                                  | 1.283804 | 0.80217  | 0.49772 | C110 | 1.00379  | 0.550664 | 0.859411 |
| H2                                                                                  | 1.366222 | 0.855602 | 0.59533 | C111 | 1.018568 | 0.59757  | 0.854573 |
| H3                                                                                  | 1.333273 | 0.950962 | 1.08476 | C112 | 0.910837 | 0.691472 | 1.151225 |
| H4                                                                                  | 1.250988 | 0.898749 | 1.00005 | C113 | 0.864895 | 0.678166 | 1.09369  |
| H5                                                                                  | 1.145798 | 0.673986 | 0.56397 | C114 | 0.835277 | 0.636562 | 0.930156 |
| H6                                                                                  | 1.169514 | 0.617104 | 0.67101 | C115 | 0.853438 | 0.608233 | 0.833162 |
| H7                                                                                  | 1.295552 | 0.722921 | 1.1331  | C116 | 0.899108 | 0.62043  | 0.889641 |
| H8                                                                                  | 1.272798 | 0.78064  | 1.03902 | C117 | 1.050235 | 0.937052 | 1.006499 |
| H9                                                                                  | 0.93156  | 0.594807 | 1.32488 | C118 | 1.017909 | 0.951447 | 1.025114 |
| H10                                                                                 | 0.90641  | 0.512067 | 1.32081 | C119 | 0.97279  | 0.921888 | 1.142202 |
| H11                                                                                 | 1.024436 | 0.538574 | 0.72704 | C120 | 0.960557 | 0.876737 | 1.243509 |
| H12                                                                                 | 1.050336 | 0.621022 | 0.71853 | C121 | 0.992186 | 0.861392 | 1.229756 |
| H13                                                                                 | 0.933357 | 0.725604 | 1.2653  | C122 | 1.194506 | 0.965985 | 0.960887 |
| H14                                                                                 | 0.852115 | 0.701362 | 1.17545 | C123 | 1.228256 | 1.010824 | 1.032795 |
| H15                                                                                 | 0.830797 | 0.575665 | 0.70322 | C124 | 1.218969 | 1.038537 | 1.239875 |
| H16                                                                                 | 0.911162 | 0.598126 | 0.78183 | C125 | 1.174101 | 1.01913  | 1.373411 |
| H17                                                                                 | 1.083809 | 0.961    | 0.89385 | C126 | 1.139611 | 0.974212 | 1.306572 |
| H18                                                                                 | 1.027507 | 0.986701 | 0.94127 | C127 | 0.897512 | 0.915232 | 1.083189 |
| H19                                                                                 | 0.925317 | 0.853107 | 1.33674 | C128 | 1.295095 | 1.108539 | 1.212068 |
| H20                                                                                 | 0.98122  | 0.82556  | 1.30894 | C129 | 1.424037 | 0.980293 | 0.952311 |
| H21                                                                                 | 1.203632 | 0.945523 | 0.79869 | C130 | 1.228354 | 0.589509 | 0.915845 |
| H22                                                                                 | 1.262695 | 1.024449 | 0.9206  | C131 | 0.960751 | 0.447414 | 0.857778 |
| H23                                                                                 | 1.166401 | 1.040169 | 1.53933 | C132 | 0.763897 | 0.640746 | 0.94007  |
| H24                                                                                 | 1.106282 | 0.960122 | 1.43357 | C133 | 1.320648 | 1.158293 | 1.272266 |
| H25                                                                                 | 0.879347 | 0.878771 | 0.99941 | C134 | 1.469301 | 1.004612 | 1.104759 |
| H26                                                                                 | 1.311907 | 1.094003 | 1.06042 | C135 | 1.485661 | 0.981897 | 1.306888 |

|     |          |          |         |      |          |          |          |
|-----|----------|----------|---------|------|----------|----------|----------|
| H27 | 1.408635 | 1.001322 | 0.87073 | C136 | 1.529487 | 1.005388 | 1.440809 |
| H28 | 1.194708 | 0.570617 | 0.79003 | C137 | 1.561586 | 1.052247 | 1.354972 |
| H29 | 0.995588 | 0.463773 | 0.74717 | C138 | 1.543252 | 1.076444 | 1.177342 |
| H30 | 0.776993 | 0.672007 | 1.09161 | C139 | 1.498838 | 1.052666 | 1.051381 |
| H31 | 1.463539 | 0.944643 | 1.36387 | C140 | 1.363923 | 1.18665  | 1.122748 |
| H32 | 1.5416   | 0.985334 | 1.58092 | C141 | 1.387948 | 1.234366 | 1.161122 |
| H33 | 1.566827 | 1.112234 | 1.093   | C142 | 1.368817 | 1.257071 | 1.347353 |
| H34 | 1.487558 | 1.071771 | 0.89414 | C143 | 1.326661 | 1.227783 | 1.514937 |
| H35 | 1.378571 | 1.171169 | 0.9602  | C144 | 1.303295 | 1.180214 | 1.473467 |
| H36 | 1.419394 | 1.255403 | 1.0165  | C145 | 1.3857   | 1.306158 | 1.314681 |
| H37 | 1.310679 | 1.243435 | 1.66364 | C146 | 1.610825 | 1.068075 | 1.347765 |
| H38 | 1.27007  | 1.159599 | 1.60104 | C147 | 1.626456 | 1.035935 | 1.277867 |
| H39 | 1.601574 | 0.998136 | 1.28222 | C148 | 1.670337 | 1.05053  | 1.154929 |
| H40 | 1.678625 | 1.023147 | 1.09357 | C149 | 1.70282  | 1.098232 | 1.105839 |
| H41 | 1.713462 | 1.168095 | 1.19126 | C150 | 1.688773 | 1.130276 | 1.200433 |
| H42 | 1.635024 | 1.142628 | 1.37205 | C151 | 1.644753 | 1.115958 | 1.320861 |
| H43 | 1.459311 | 1.327331 | 1.26401 | C152 | 1.433231 | 1.338659 | 1.249138 |
| H44 | 1.485164 | 1.407249 | 1.11948 | C153 | 1.447421 | 1.383717 | 1.15176  |
| H45 | 1.341587 | 1.378523 | 1.17986 | C154 | 1.415528 | 1.399877 | 1.110518 |
| H46 | 1.316689 | 1.300087 | 1.33987 | C155 | 1.368583 | 1.368395 | 1.193139 |
| H47 | 1.844595 | 1.157714 | 0.90677 | C156 | 1.354184 | 1.323614 | 1.296274 |
| H48 | 1.895301 | 1.237024 | 0.74289 | C157 | 1.474844 | 1.478666 | 0.871994 |
| H49 | 1.774765 | 1.252881 | 0.55239 | C158 | 1.396465 | 1.462159 | 1.034705 |
| H50 | 1.723532 | 1.172669 | 0.71372 | C159 | 1.766264 | 1.081747 | 1.008365 |
| H51 | 1.721991 | 1.033689 | 0.64278 | C160 | 1.779103 | 1.158906 | 0.849654 |
| H52 | 1.752953 | 0.980653 | 0.69967 | C161 | 1.827992 | 1.177875 | 0.832344 |
| H53 | 1.847557 | 1.071824 | 1.43943 | C162 | 1.85736  | 1.222584 | 0.720532 |
| H54 | 1.814749 | 1.1224   | 1.38134 | C163 | 1.839674 | 1.252549 | 0.635933 |
| H55 | 1.487158 | 1.425847 | 0.65767 | C164 | 1.790431 | 1.231544 | 0.619511 |
| H56 | 1.566699 | 1.478786 | 0.50234 | C165 | 1.761444 | 1.186648 | 0.727742 |

|     |          |          |         |      |          |          |          |
|-----|----------|----------|---------|------|----------|----------|----------|
| H57 | 1.551895 | 1.595681 | 0.82724 | C166 | 1.74917  | 1.041094 | 0.822486 |
| H58 | 1.474714 | 1.543159 | 0.9989  | C167 | 1.76665  | 1.011168 | 0.858008 |
| H59 | 1.433644 | 1.510811 | 1.41678 | C168 | 1.80338  | 1.02092  | 1.075354 |
| H60 | 1.379559 | 1.539806 | 1.45954 | C169 | 1.820008 | 1.062157 | 1.260356 |
| H61 | 1.293647 | 1.442429 | 0.7153  | C170 | 1.801613 | 1.09117  | 1.23004  |
| H62 | 1.350205 | 1.416094 | 0.6688  | C171 | 1.501787 | 1.463271 | 0.707739 |
| H63 | 1.350357 | 1.578418 | 1.35428 | C172 | 1.546514 | 1.494037 | 0.601302 |
| H64 | 1.308665 | 1.619063 | 1.26965 | C173 | 1.568226 | 1.542707 | 0.66333  |
| H65 | 1.202723 | 1.501657 | 0.73059 | C174 | 1.538425 | 1.558313 | 0.782357 |
| H66 | 1.2435   | 1.459342 | 0.81752 | C175 | 1.494039 | 1.527513 | 0.89242  |
| H67 | 1.92945  | 1.306808 | 0.41499 | C176 | 1.40307  | 1.496547 | 1.25761  |
| H68 | 1.981017 | 1.389487 | 0.52901 | C177 | 1.371729 | 1.512328 | 1.282992 |
| H69 | 1.868997 | 1.393159 | 1.0465  | C178 | 1.330947 | 1.49407  | 1.091537 |
| H70 | 1.81741  | 1.31132  | 0.93407 | C179 | 1.323625 | 1.4576   | 0.87867  |
| H71 | 1.770069 | 0.931217 | 0.84352 | C180 | 1.355878 | 1.442967 | 0.846542 |
| H72 | 1.811122 | 0.887864 | 0.83949 | C181 | 1.301448 | 1.514826 | 1.090665 |
| H73 | 1.926072 | 1.000046 | 1.36035 | C182 | 1.618538 | 1.572047 | 0.681253 |
| H74 | 1.887466 | 1.044265 | 1.35626 | C183 | 1.868524 | 1.302202 | 0.655541 |
| H75 | 1.6354   | 1.527304 | 0.39071 | C184 | 1.824741 | 0.99218  | 1.098265 |
| H76 | 1.716852 | 1.565986 | 0.52685 | C185 | 1.317242 | 1.559983 | 1.223054 |
| H77 | 1.699937 | 1.663319 | 1.12811 | C186 | 1.293772 | 1.583754 | 1.168731 |
| H78 | 1.618266 | 1.624421 | 1.00429 | C187 | 1.252416 | 1.564189 | 0.987754 |
| C79 | 1.070894 | 0.734739 | 0.88545 | C188 | 1.234944 | 1.51847  | 0.873071 |
| C80 | 1.117769 | 0.760326 | 0.82325 | C189 | 1.25808  | 1.494199 | 0.924818 |
| C81 | 1.140134 | 0.807366 | 0.84733 | C190 | 1.915882 | 1.326079 | 0.549075 |
| C82 | 1.115711 | 0.829349 | 0.92116 | C191 | 1.944926 | 1.372535 | 0.618152 |
| C83 | 1.069424 | 0.804289 | 0.98842 | C192 | 1.929334 | 1.398355 | 0.794251 |
| C84 | 1.046913 | 0.756445 | 0.97348 | C193 | 1.882743 | 1.37493  | 0.902492 |
| C85 | 1.116443 | 0.897558 | 1.04023 | C194 | 1.852859 | 1.328823 | 0.833028 |
| C86 | 1.069245 | 0.873125 | 1.07349 | C195 | 1.804349 | 0.946777 | 0.960391 |

|      |          |          |         |      |          |          |          |
|------|----------|----------|---------|------|----------|----------|----------|
| C87  | 0.979999 | 0.684685 | 1.02215 | C196 | 1.827663 | 0.922069 | 0.958481 |
| C88  | 1.005457 | 0.663274 | 0.97372 | C197 | 1.872199 | 0.94033  | 1.095902 |
| C89  | 1.188646 | 0.763591 | 0.76238 | C198 | 1.891714 | 0.984328 | 1.24376  |
| C90  | 1.210873 | 0.811135 | 0.76296 | C199 | 1.869121 | 1.009503 | 1.246302 |
| C91  | 1.038764 | 0.891008 | 1.11011 | C200 | 1.649038 | 1.557771 | 0.549395 |
| C92  | 1.148385 | 0.945327 | 1.09559 | C201 | 1.695488 | 1.57958  | 0.631066 |
| C93  | 0.930786 | 0.664229 | 1.03833 | C202 | 1.715503 | 1.617976 | 0.840974 |
| C94  | 0.991679 | 0.615601 | 1.00441 | C203 | 1.686228 | 1.633876 | 0.959988 |
| C95  | 1.258937 | 0.844072 | 0.75024 | C204 | 1.639658 | 1.612301 | 0.882188 |
| C96  | 1.207837 | 0.733764 | 0.77735 | N205 | 1.139794 | 0.87519  | 0.945626 |
| C97  | 1.293792 | 0.834786 | 0.62492 | N206 | 1.045364 | 0.824904 | 1.066592 |
| C98  | 1.340527 | 0.864935 | 0.682   | N207 | 1.001833 | 0.732661 | 1.041092 |
| C99  | 1.355815 | 0.906775 | 0.85136 | N208 | 1.051509 | 0.688853 | 0.884179 |
| C100 | 1.322479 | 0.918457 | 0.95176 | N209 | 1.140731 | 0.737887 | 0.768679 |
| C101 | 1.275727 | 0.889033 | 0.89865 | N210 | 1.185718 | 0.833353 | 0.812558 |
| C102 | 1.179788 | 0.685814 | 0.68056 | N211 | 0.941415 | 0.938308 | 1.154221 |
| C103 | 1.192886 | 0.653318 | 0.74714 | N212 | 1.2525   | 1.084668 | 1.314457 |
| C104 | 1.23463  | 0.665794 | 0.90987 | N213 | 1.402978 | 0.935169 | 0.930516 |
| C105 | 1.263013 | 0.712564 | 1.00159 | N214 | 1.248878 | 0.63355  | 0.985141 |
| C106 | 1.251002 | 0.745921 | 0.93539 | N215 | 0.944389 | 0.470443 | 1.006891 |
| C107 | 0.951916 | 0.583084 | 1.18653 | N216 | 0.788738 | 0.622283 | 0.855627 |
| C108 | 0.938067 | 0.53635  | 1.18801 | N217 | 1.429495 | 1.446567 | 1.002625 |
| C109 | 0.962704 | 0.518846 | 1.01944 | N218 | 1.748583 | 1.112991 | 0.977714 |
